# Supplementary material for: One-step self-assembly of curcumin-loaded zein/sophorolipid nanoparticles: physicochemical stability, redispersibility, solubility and bioaccessibility
Source: Royal Society of Chemistry journal article supplement (doi:10.1039/d1fo00942g), 2021-01-01
Supplement: d1fo00942g1.pdf [file d1fo00942g1.pdf]

**One Step Self-Assembly of Curcumin-Loaded Zein/Sophorolipid  
Nanoparticles: Physicochemical Stability, Redispersibility, Solubility  
and Bioaccessibility**

Yongkai Yuan,<sup>a</sup> Jiawei Huang,<sup>a</sup> Shuguang He,<sup>a</sup> Mengjie Ma,<sup>b</sup> Dongfeng Wang,<sup>a</sup> and

Ying Xu<sup>a,\*</sup>

<sup>a</sup> College of Food Science and Engineering, Ocean University of China, Qingdao,  
Shandong Province, 266003, People's Republic of China

<sup>b</sup> School of Medicine and Pharmacy, Ocean University of China, Qingdao, Shandong  
Province, 266003, People's Republic of China

\* Corresponding author: Ying Xu

Telephone: +860532-82031575

E-mail: xuy@ouc.edu.cn

**Table S1 Composition of simulated gastric fluid (SGF) and simulated intestinal fluids (SIF)**

| Reagents                                          | SGF (pH = 3) | SIF (pH = 7) |
|---------------------------------------------------|--------------|--------------|
| KCl                                               | 5.52 mM      | 5.44 mM      |
| KH <sub>2</sub> PO <sub>4</sub>                   | 0.72 mM      | 0.64 mM      |
| NaHCO <sub>3</sub>                                | 20.00 mM     | 68.00 mM     |
| NaCl                                              | 37.76 mM     | 30.72 mM     |
| MgCl <sub>2</sub> (H <sub>2</sub> O) <sub>6</sub> | 0.08 mM      | 0.26 mM      |
| (NH <sub>4</sub> ) <sub>2</sub> CO <sub>3</sub>   | 0.40 mM      | none         |
| HCl                                               | 22.48 mM     | 6.72 mM      |
| NaOH                                              | none         | 3.73 mM      |
| CaCl <sub>2</sub> (H <sub>2</sub> O) <sub>2</sub> | 0.07 mM      | 0.30 mM      |
| lecithin                                          | 0.17 mM      | none         |
| pepsin                                            | 2000.00 U/mL | none         |
| pancreatin                                        | none         | 100.00 U/mL  |
| bile extract                                      | none         | 6.25 mg/mL   |

**Table S2 Degradation kinetic parameters of Cur during storage**

| Temperature | Sample     | K(day <sup>-1</sup> ) | T <sub>1/2</sub> (day) | R <sup>2</sup> |
|-------------|------------|-----------------------|------------------------|----------------|
| 25 °C       | Curcumin   | 0.1711                | 4.05                   | 0.9440         |
|             | Cur-Z/SNPs | 0.0182                | 38.09                  | 0.9860         |
| 4 °C        | Curcumin   | 0.1115                | 6.22                   | 0.9887         |
|             | Cur-Z/SNPs | 0.0181                | 38.30                  | 0.9741         |
